# Supplementary material for: Large-scale extraction of interpretable features provides new insights into kidney histopathology – A proof-of-concept study
Source: PubMed Central journal article supplement — J Pathol Inform. 2022 May 25;13:100097. doi: 10.1016/j.jpi.2022.100097 (PMC9576990; doi:10.1016/j.jpi.2022.100097), 2022-05-25
Supplement: mmc1.pdf [file mmc1.pdf]

# **Large-scale extraction of interpretable features provides new insights into kidney histopathology – a proof-of-concept study**

**Laxmi Gupta<sup>1,\*</sup>, Barbara Mara Klinkhammer<sup>2</sup>, Claudia Seikrit<sup>2,3</sup>, Nina Fan<sup>1</sup>, Nassim Bouteldja<sup>1,2</sup>, Philipp Gräbel<sup>1</sup>, Michael Gadermayr<sup>1,4</sup>, Peter Boor<sup>2</sup>, and Dorit Merhof<sup>1</sup>**

<sup>1</sup>Institute of Imaging & Computer Vision, RWTH Aachen University, Aachen, Germany

<sup>2</sup>Institute of Pathology, University Hospital Aachen, RWTH Aachen University, Aachen, Germany

<sup>3</sup>Division of Nephrology and Clinical Immunology, RWTH Aachen University, Aachen, Germany

<sup>4</sup>Salzburg University of Applied Sciences, Puch/Salzburg, Austria

\*corresponding author: laxmi.gupta@ifb.rwth-aachen.de

## **A Supplementary Material**

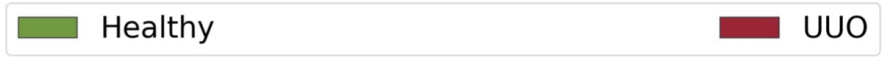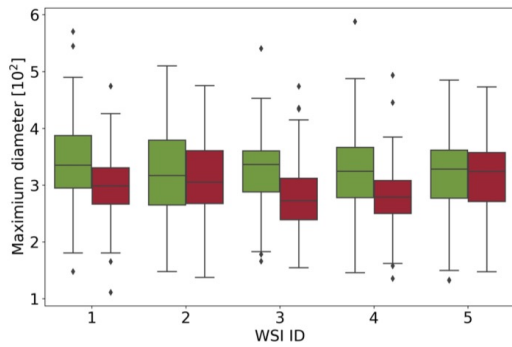

(a) BMC shape

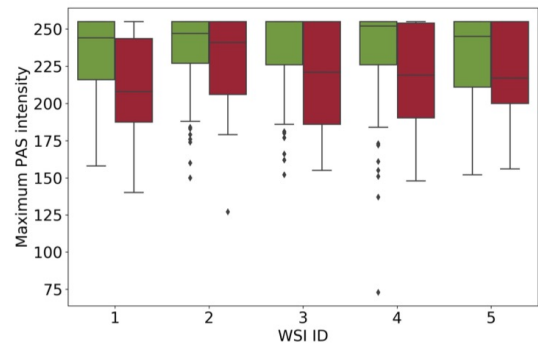

(b) Glomeruli intensity

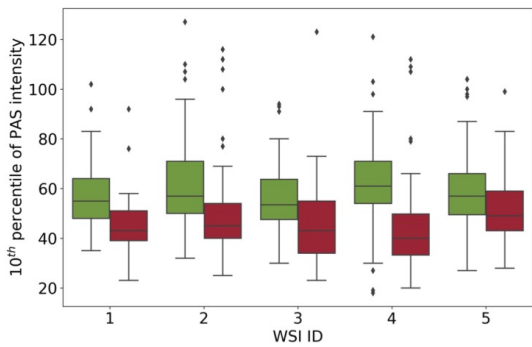

(c) Glomeruli intensity

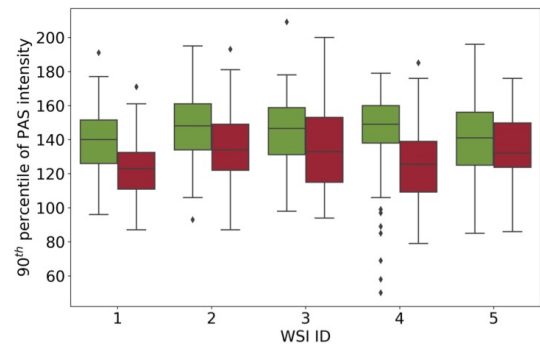

(d) Glomeruli intensity

**Supplementary Figure 1.** Individual features per object. The X-axis shows the five WSIs and the corresponding feature values are shown on the Y-Axis, with green representing healthy and red, UUO. Examples shown include the BMC shape feature maximum diameter (a), glomeruli PAS intensity features, namely maximum intensity (b), intensity range (c), 10th percentile (d), 90th percentile (e), and the glomeruli color feature namely percentage of light PAS area.

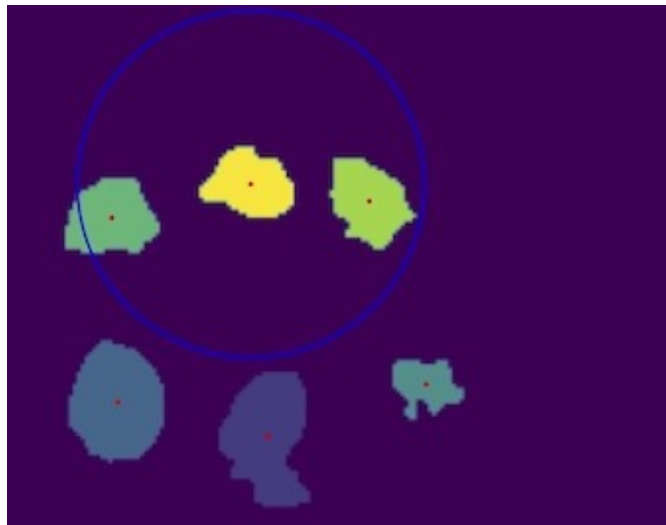

**Supplementary Figure 2.** Illustration of nuclei neighbour calculation. Nuclei neighbours are defined as the number of nuclei located within a certain radius of each nucleus as its neighbours. The radius is defined as two times the average of the lengths of the major axes of all the nuclei in a ROI.

| Figure                                                                              | Morphological feature | Equation                                                                     | Description                                                                                                           |
|-------------------------------------------------------------------------------------|-----------------------|------------------------------------------------------------------------------|-----------------------------------------------------------------------------------------------------------------------|
|    | Area                  | -                                                                            | Number of pixels within contour. Area is shown in green color in the figure.                                          |
|    | Perimeter             | -                                                                            | Length of contour. Perimeter is shown as green boundary in figure.                                                    |
|    | Convex area           | -                                                                            | Number of pixels within convex contour. Convex area is shown in green color in the figure.                            |
|    | Convex perimeter      | -                                                                            | Length of convex contour. Convex perimeter is shown as green boundary in figure.                                      |
|   | Minor axis            | -                                                                            | Length of minor axis of bounding ellipse. Minor axis is shown in blue color for the ellipse shown in green in figure. |
|  | Major axis            | -                                                                            | Length of major axis of bounding ellipse. Major axis is shown in red color for the ellipse shown in green in figure.  |
|                                                                                     | Solidity              | $\frac{\text{area}}{\text{convex area}}$                                     | Ratio of object area to its convex hull area. Describes to what extent the object is concave or convex.               |
|                                                                                     | Convexity             | $\frac{\text{perimeter}}{\text{convex perimeter}}$                           | Ratio of convex hull perimeter to the contour perimeter.                                                              |
|  | Rectangularity        | $\frac{\text{area}}{\text{bounding box area}}$                               | Ratio of object area to area of minimum bounding box. In the figure, the minimum bounding box is shown in green.      |
|                                                                                     | Equivalent Diameter   | $\sqrt{\frac{4 * \text{object area}}{\pi}}$                                  | Diameter of the circle with the same area as the object.                                                              |
|                                                                                     | Compactness           | $\frac{4 * \pi * \text{area}}{\text{perimeter}^2}$                           | Ratio between object area to area of a circle with same perimeter.                                                    |
|                                                                                     | Elongation            | $1 - \frac{\text{minor axis}}{\text{major axis}}$                            | Describing the length of the object.                                                                                  |
|                                                                                     | Eccentricity          | $\frac{\sqrt{\text{major axis}^2 - \text{minor axis}^2}}{\text{major axis}}$ | The ratio of distance between major and minor axis. Takes values in [0,1].                                            |

**Supplementary Table 1.** Definitions of morphological features

| <b>Color feature</b>        | <b>Description</b>                                                             |
|-----------------------------|--------------------------------------------------------------------------------|
| Color area                  | Number of pixels of a given color within the object                            |
| Color density               | Color area divided by the object area                                          |
| <b>Nuclei feature</b>       | <b>Description</b>                                                             |
| Nuclei count                | Number of nuclei within the object.                                            |
| Nuclei density              | Number of nuclei divided by the object area.                                   |
| Mean number of neighbours   | Mean value of the number of neighbours around each nucleus within the object.  |
| Max number of neighbours    | Maximum value of the number of neighbours per nucleus within the object.       |
| Min number of neighbours    | Minimum value of the number of neighbours per nucleus within the object.       |
| Median number of neighbours | Mean value of the number of neighbours per nucleus within the object.          |
| STD                         | Standard deviation of the distribution of nuclei neighbours within the object. |

**Supplementary Table 2.** Definitions of color and nuclei-related features.

## **B Tables showing all features per object and the results after feature selection**

Here, tables showing results per feature type are presented. The features that are significantly different in healthy and corresponding UWO WSIs are shown in purple. If no significant differences are found, features are highlighted in light blue. The number in each cell shows the trend for the feature for the WSI pair. If the median of the features from a healthy WSI is higher than that of the corresponding UWO WSI, it is marked as 1, otherwise as -1. The features that significantly different for at least 3 WSI pairs and follow the same trend for all five of them, are finally chosen after the feature selection step. These are outlined in black.

### Morphological features

| Object          | WSI ID | Area | Perimeter | Convex Area | Convex Perimeter | Major Axis Length | Minor Axis Length | Solidity | Convexity | Rectangularity | Equivalent Diameter | Circularity | Elongation | Eccentricity |
|-----------------|--------|------|-----------|-------------|------------------|-------------------|-------------------|----------|-----------|----------------|---------------------|-------------|------------|--------------|
| Glomerulus      | 1      | 1    | 1         | 1           | 1                | 1                 | 1                 | -1       | 1         | 1              | 1                   | -1          | -1         | -1           |
|                 | 2      | 1    | 1         | 1           | 1                | 1                 | 1                 | -1       | 1         | -1             | 1                   | -1          | -1         | -1           |
|                 | 3      | 1    | 1         | 1           | 1                | 1                 | 1                 | -1       | 1         | 1              | 1                   | -1          | -1         | -1           |
|                 | 4      | 1    | 1         | 1           | 1                | 1                 | 1                 | -1       | 1         | 1              | 1                   | -1          | -1         | 1            |
|                 | 5      | -1   | -1        | -1          | -1               | -1                | -1                | -1       | 1         | -1             | -1                  | -1          | 1          | 1            |
| BMC             | 1      | -1   | 1         | 1           | 1                | 1                 | 1                 | -1       | 1         | -1             | -1                  | -1          | 1          | 1            |
|                 | 2      | 1    | 1         | 1           | 1                | 1                 | 1                 | -1       | 1         | 1              | 1                   | -1          | 1          | 1            |
|                 | 3      | 1    | 1         | 1           | 1                | 1                 | 1                 | -1       | 1         | 1              | 1                   | -1          | 1          | 1            |
|                 | 4      | 1    | 1         | 1           | 1                | 1                 | 1                 | -1       | 1         | 1              | 1                   | -1          | 1          | 1            |
|                 | 5      | -1   | 1         | -1          | -1               | -1                | -1                | -1       | 1         | -1             | -1                  | -1          | 1          | 1            |
| Artery          | 1      | 1    | 1         | 1           | 1                | 1                 | 1                 | 1        | 1         | 1              | 1                   | 1           | 1          | 1            |
|                 | 2      | 1    | 1         | 1           | 1                | 1                 | 1                 | -1       | 1         | 1              | 1                   | -1          | 1          | 1            |
|                 | 3      | 1    | 1         | 1           | 1                | 1                 | -1                | -1       | 1         | 1              | 1                   | -1          | 1          | 1            |
|                 | 4      | 1    | 1         | 1           | 1                | 1                 | -1                | -1       | 1         | -1             | 1                   | -1          | 1          | 1            |
|                 | 5      | 1    | 1         | 1           | 1                | 1                 | 1                 | -1       | -1        | 1              | 1                   | 1           | 1          | 1            |
| Lumen           | 1      | -1   | -1        | -1          | -1               | -1                | -1                | 1        | -1        | -1             | -1                  | 1           | -1         | -1           |
|                 | 2      | 1    | 1         | 1           | 1                | 1                 | 1                 | -1       | 1         | 1              | 1                   | -1          | 1          | 1            |
|                 | 3      | -1   | 1         | -1          | 1                | 1                 | -1                | 1        | -1        | -1             | -1                  | -1          | 1          | 1            |
|                 | 4      | 1    | 1         | 1           | 1                | 1                 | 1                 | -1       | 1         | 1              | 1                   | -1          | -1         | -1           |
|                 | 5      | -1   | -1        | -1          | -1               | -1                | -1                | 1        | -1        | -1             | -1                  | 1           | 1          | 1            |
| Tubule          | 1      | 1    | 1         | 1           | 1                | 1                 | 1                 | 1        | -1        | 1              | 1                   | 1           | -1         | -1           |
|                 | 2      | 1    | 1         | 1           | 1                | 1                 | 1                 | 1        | 1         | 1              | 1                   | -1          | 1          | 1            |
|                 | 3      | 1    | 1         | 1           | 1                | 1                 | 1                 | 1        | -1        | 1              | 1                   | 1           | 1          | 1            |
|                 | 4      | 1    | 1         | 1           | 1                | 1                 | 1                 | -1       | 1         | 1              | 1                   | -1          | 1          | 1            |
|                 | 5      | 1    | 1         | 1           | 1                | 1                 | 1                 | 1        | 1         | 1              | 1                   | -1          | 1          | 1            |
| Interstitialium | 1      | NA   | NA        | NA          | NA               | NA                | NA                | NA       | NA        | NA             | NA                  | NA          | NA         | NA           |
|                 | 2      | NA   | NA        | NA          | NA               | NA                | NA                | NA       | NA        | NA             | NA                  | NA          | NA         | NA           |
|                 | 3      | NA   | NA        | NA          | NA               | NA                | NA                | NA       | NA        | NA             | NA                  | NA          | NA         | NA           |
|                 | 4      | NA   | NA        | NA          | NA               | NA                | NA                | NA       | NA        | NA             | NA                  | NA          | NA         | NA           |
|                 | 5      | NA   | NA        | NA          | NA               | NA                | NA                | NA       | NA        | NA             | NA                  | NA          | NA         | NA           |

Supplementary Figure 3. Morphological features

### Shape features

| Object          | WSI ID | Elongation | Major Axis Length | Maximum Diameter | Mesh Surface Area | Minor Axis Length | Perimeter | Perimeter Surface Ratio | Pixel Surface Area | Sphericity |
|-----------------|--------|------------|-------------------|------------------|-------------------|-------------------|-----------|-------------------------|--------------------|------------|
| Glomerulus      | 1      | 1          | 1                 | 1                | 1                 | 1                 | 1         | -1                      | 1                  | -1         |
|                 | 2      | 1          | 1                 | 1                | 1                 | 1                 | 1         | 1                       | 1                  | -1         |
|                 | 3      | 1          | 1                 | 1                | 1                 | 1                 | 1         | -1                      | 1                  | -1         |
|                 | 4      | -1         | 1                 | 1                | 1                 | 1                 | 1         | 1                       | -1                 | 1          |
|                 | 5      | -1         | -1                | -1               | -1                | -1                | -1        | 1                       | -1                 | -1         |
| BMC             | 1      | -1         | 1                 | 1                | 1                 | 1                 | 1         | -1                      | 1                  | -1         |
|                 | 2      | -1         | -1                | 1                | 1                 | 1                 | 1         | -1                      | 1                  | 1          |
|                 | 3      | 1          | 1                 | 1                | 1                 | 1                 | 1         | -1                      | 1                  | 1          |
|                 | 4      | 1          | 1                 | 1                | 1                 | 1                 | 1         | -1                      | 1                  | 1          |
|                 | 5      | -1         | -1                | 1                | 1                 | -1                | -1        | -1                      | 1                  | 1          |
| Artery          | 1      | -1         | 1                 | 1                | 1                 | 1                 | -1        | -1                      | 1                  | 1          |
|                 | 2      | -1         | 1                 | 1                | 1                 | 1                 | 1         | 1                       | 1                  | -1         |
|                 | 3      | -1         | 1                 | 1                | 1                 | -1                | 1         | -1                      | 1                  | 1          |
|                 | 4      | -1         | 1                 | 1                | 1                 | -1                | 1         | 1                       | 1                  | -1         |
|                 | 5      | -1         | 1                 | 1                | 1                 | -1                | 1         | -1                      | 1                  | 1          |
| Lumen           | 1      | 1          | -1                | -1               | -1                | 1                 | -1        | -1                      | -1                 | 1          |
|                 | 2      | 1          | 1                 | 1                | 1                 | 1                 | 1         | -1                      | 1                  | -1         |
|                 | 3      | -1         | 1                 | -1               | -1                | -1                | -1        | 1                       | -1                 | -1         |
|                 | 4      | -1         | 1                 | 1                | 1                 | 1                 | 1         | 1                       | 1                  | -1         |
|                 | 5      | 1          | -1                | -1               | -1                | -1                | -1        | 1                       | -1                 | -1         |
| Tubule          | 1      | 1          | 1                 | 1                | 1                 | 1                 | 1         | -1                      | 1                  | 1          |
|                 | 2      | -1         | 1                 | 1                | 1                 | 1                 | 1         | -1                      | 1                  | -1         |
|                 | 3      | -1         | 1                 | 1                | 1                 | 1                 | 1         | -1                      | 1                  | 1          |
|                 | 4      | -1         | 1                 | 1                | 1                 | 1                 | 1         | -1                      | 1                  | -1         |
|                 | 5      | -1         | 1                 | 1                | 1                 | 1                 | 1         | -1                      | 1                  | -1         |
| Interstitialium | 1      | NA         | NA                | NA               | NA                | NA                | NA        | NA                      | NA                 | NA         |
|                 | 2      | NA         | NA                | NA               | NA                | NA                | NA        | NA                      | NA                 | NA         |
|                 | 3      | NA         | NA                | NA               | NA                | NA                | NA        | NA                      | NA                 | NA         |
|                 | 4      | NA         | NA                | NA               | NA                | NA                | NA        | NA                      | NA                 | NA         |
|                 | 5      | NA         | NA                | NA               | NA                | NA                | NA        | NA                      | NA                 | NA         |

Supplementary Figure 4. Shape features



## Color features

| Object       | WSI ID | Haematoxylin Area | Light Magenta Area | Dark PAS Area | Unstained Area | Hamatoxylin Area Percentage | Light Magenta Area Percentage | Dark PAS Area Percentage | Unstained Area Percentage |
|--------------|--------|-------------------|--------------------|---------------|----------------|-----------------------------|-------------------------------|--------------------------|---------------------------|
| Glomerulus   | 1      | 1                 | 1                  | -1            | -1             | -1                          | 1                             | -1                       | 1                         |
|              | 2      | -1                | 1                  | -1            | -1             | -1                          | 1                             | 1                        | -1                        |
|              | 3      | 1                 | 1                  | 1             | -1             | 1                           | 1                             | 1                        | -1                        |
|              | 4      | -1                | 1                  | 1             | 1              | -1                          | 1                             | 1                        | 1                         |
|              | 5      | 1                 | -1                 | -1            | -1             | 1                           | 1                             | 1                        | -1                        |
| BMC          | 1      | 1                 | 1                  | 1             | -1             | -1                          | 1                             | -1                       | -1                        |
|              | 2      | 1                 | 1                  | 1             | -1             | -1                          | 1                             | 1                        | -1                        |
|              | 3      | 1                 | 1                  | 1             | 1              | -1                          | 1                             | -1                       | -1                        |
|              | 4      | 1                 | 1                  | 1             | 1              | -1                          | 1                             | -1                       | -1                        |
|              | 5      | -1                | 1                  | 1             | -1             | 1                           | 1                             | -1                       | -1                        |
| Artery       | 1      | -1                | 1                  | -1            | 1              | -1                          | 1                             | -1                       | 1                         |
|              | 2      | -1                | 1                  | -1            | 1              | -1                          | 1                             | -1                       | 1                         |
|              | 3      | 1                 | 1                  | 1             | -1             | 1                           | 1                             | -1                       | -1                        |
|              | 4      | -1                | 1                  | -1            | 1              | -1                          | 1                             | -1                       | 1                         |
|              | 5      | 1                 | 1                  | 1             | 1              | -1                          | 1                             | -1                       | 1                         |
| Lumen        | 1      | 1                 | -1                 | -1            | -1             | 1                           | -1                            | -1                       | 1                         |
|              | 2      | 1                 | 1                  | 1             | 1              | 1                           | 1                             | -1                       | -1                        |
|              | 3      | 1                 | -1                 | -1            | -1             | 1                           | -1                            | -1                       | 1                         |
|              | 4      | 1                 | -1                 | -1            | 1              | 1                           | -1                            | -1                       | 1                         |
|              | 5      | 1                 | -1                 | 1             | -1             | 1                           | 1                             | -1                       | -1                        |
| Tubule       | 1      | 1                 | 1                  | 1             | 1              | -1                          | 1                             | -1                       | -1                        |
|              | 2      | -1                | 1                  | 1             | -1             | -1                          | 1                             | -1                       | -1                        |
|              | 3      | 1                 | 1                  | 1             | -1             | -1                          | 1                             | -1                       | -1                        |
|              | 4      | -1                | 1                  | 1             | 1              | -1                          | 1                             | -1                       | 1                         |
|              | 5      | -1                | 1                  | 1             | -1             | -1                          | 1                             | -1                       | -1                        |
| Interstitial | 1      | -1                | -1                 | -1            | -1             | -1                          | -1                            | -1                       | 1                         |
|              | 2      | -1                | -1                 | -1            | -1             | -1                          | -1                            | -1                       | 1                         |
|              | 3      | -1                | -1                 | -1            | -1             | -1                          | -1                            | -1                       | 1                         |
|              | 4      | -1                | -1                 | -1            | 1              | -1                          | -1                            | -1                       | 1                         |
|              | 5      | -1                | -1                 | -1            | -1             | 1                           | -1                            | -1                       | 1                         |

Supplementary Figure 5. Color features

## Nuclei features

| Object          | WSI ID | Nuclei Count | Nuclei Density | Nuclei Neighbour Standard Deviation | Maximum Nuclei Neighbour | Minimum Nuclei Neighbour | Mean Nuclei Neighbour | Median Nuclei Neighbour |
|-----------------|--------|--------------|----------------|-------------------------------------|--------------------------|--------------------------|-----------------------|-------------------------|
| Glomerulus      | 1      | 1            | -1             | -1                                  | 1                        | -1                       | -1                    | -1                      |
|                 | 2      | 1            | -1             | 1                                   | 1                        | 1                        | -1                    | -1                      |
|                 | 3      | 1            | -1             | -1                                  | 1                        | 1                        | -1                    | 1                       |
|                 | 4      | -1           | -1             | -1                                  | -1                       | -1                       | -1                    | -1                      |
|                 | 5      | 1            | 1              | 1                                   | 1                        | -1                       | 1                     | 1                       |
| BMC             | 1      | -1           | -1             | -1                                  | -1                       | 1                        | -1                    | -1                      |
|                 | 2      | -1           | -1             | -1                                  | -1                       | 1                        | -1                    | 1                       |
|                 | 3      | 1            | -1             | -1                                  | -1                       | 1                        | -1                    | -1                      |
|                 | 4      | -1           | -1             | -1                                  | -1                       | 1                        | -1                    | -1                      |
|                 | 5      | -1           | -1             | -1                                  | 1                        | 1                        | -1                    | -1                      |
| Artery          | 1      | NA           | NA             | NA                                  | NA                       | NA                       | NA                    | NA                      |
|                 | 2      | NA           | NA             | NA                                  | NA                       | NA                       | NA                    | NA                      |
|                 | 3      | NA           | NA             | NA                                  | NA                       | NA                       | NA                    | NA                      |
|                 | 4      | NA           | NA             | NA                                  | NA                       | NA                       | NA                    | NA                      |
|                 | 5      | NA           | NA             | NA                                  | NA                       | NA                       | NA                    | NA                      |
| Lumen           | 1      | NA           | NA             | NA                                  | NA                       | NA                       | NA                    | NA                      |
|                 | 2      | NA           | NA             | NA                                  | NA                       | NA                       | NA                    | NA                      |
|                 | 3      | NA           | NA             | NA                                  | NA                       | NA                       | NA                    | NA                      |
|                 | 4      | NA           | NA             | NA                                  | NA                       | NA                       | NA                    | NA                      |
|                 | 5      | NA           | NA             | NA                                  | NA                       | NA                       | NA                    | NA                      |
| Tubule          | 1      | 1            | -1             | -1                                  | -1                       | -1                       | -1                    | 1                       |
|                 | 2      | -1           | -1             | -1                                  | -1                       | -1                       | -1                    | 1                       |
|                 | 3      | 1            | -1             | 1                                   | 1                        | 1                        | -1                    | 1                       |
|                 | 4      | 1            | -1             | -1                                  | -1                       | -1                       | -1                    | -1                      |
|                 | 5      | -1           | -1             | -1                                  | 1                        | -1                       | -1                    | 1                       |
| Interstitialium | 1      | -1           | -1             | -1                                  | -1                       | 1                        | -1                    | -1                      |
|                 | 2      | -1           | -1             | -1                                  | -1                       | 1                        | -1                    | -1                      |
|                 | 3      | -1           | 1              | -1                                  | -1                       | 1                        | -1                    | -1                      |
|                 | 4      | -1           | -1             | -1                                  | -1                       | 1                        | -1                    | -1                      |
|                 | 5      | -1           | 1              | -1                                  | -1                       | 1                        | -1                    | -1                      |

Supplementary Figure 6. Nuclei features





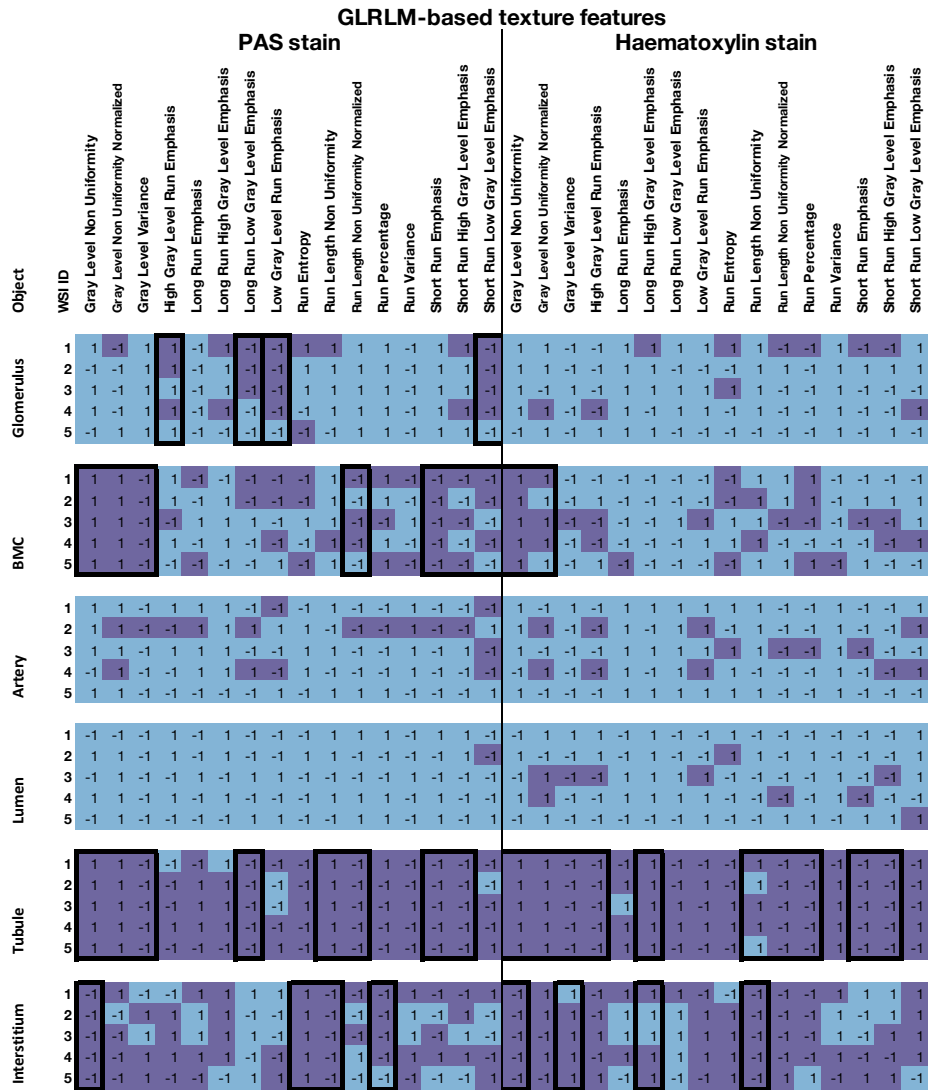

Supplementary Figure 9. GLRLM-based texture features



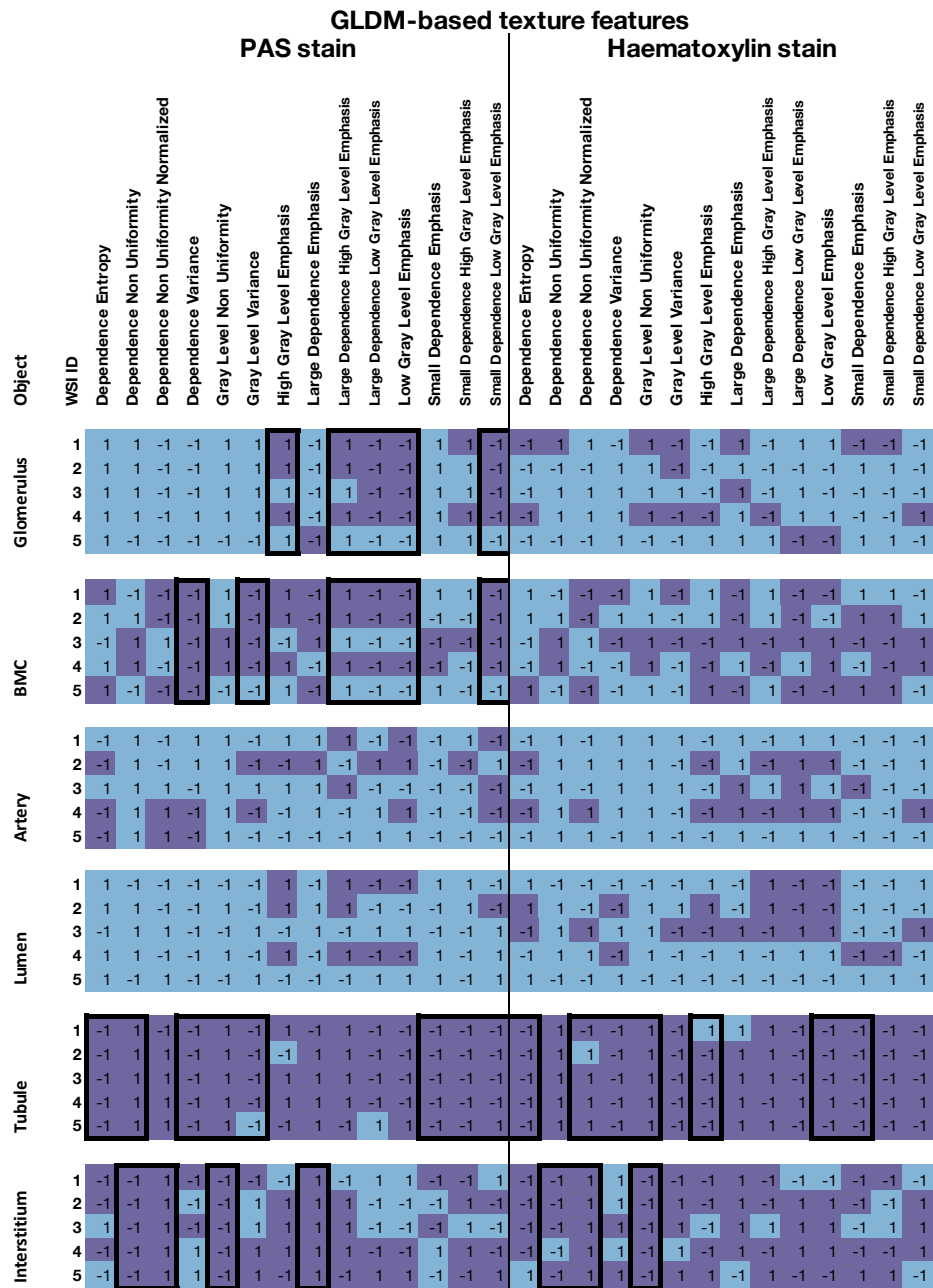

Supplementary Figure 11. GLDM-based texture features  
eltab:glgm\_features

**NGTDM-based texture features**

| Object          | WSI ID | PAS stain |            |            |          |          | Haematoxylin stain |            |            |          |          |
|-----------------|--------|-----------|------------|------------|----------|----------|--------------------|------------|------------|----------|----------|
|                 |        | Busyness  | Coarseness | Complexity | Contrast | Strength | Busyness           | Coarseness | Complexity | Contrast | Strength |
| Glomerulus      | 1      | -1        | -1         | 1          | -1       | 1        | 1                  | -1         | -1         | -1       | -1       |
|                 | 2      | -1        | -1         | 1          | -1       | 1        | 1                  | -1         | 1          | -1       | -1       |
|                 | 3      | 1         | -1         | 1          | -1       | -1       | 1                  | -1         | -1         | -1       | -1       |
|                 | 4      | -1        | -1         | 1          | -1       | -1       | 1                  | -1         | 1          | -1       | -1       |
|                 | 5      | -1        | 1          | 1          | -1       | 1        | -1                 | 1          | 1          | -1       | 1        |
| BMC             | 1      | 1         | -1         | 1          | 1        | -1       | 1                  | -1         | 1          | -1       | -1       |
|                 | 2      | 1         | -1         | -1         | -1       | -1       | 1                  | -1         | 1          | -1       | -1       |
|                 | 3      | 1         | -1         | -1         | -1       | -1       | 1                  | -1         | 1          | -1       | -1       |
|                 | 4      | 1         | -1         | -1         | -1       | -1       | 1                  | -1         | 1          | -1       | -1       |
|                 | 5      | 1         | -1         | 1          | 1        | -1       | 1                  | -1         | 1          | 1        | -1       |
| Artery          | 1      | 1         | -1         | 1          | -1       | -1       | 1                  | -1         | 1          | -1       | 1        |
|                 | 2      | 1         | -1         | -1         | -1       | -1       | 1                  | -1         | -1         | 1        | -1       |
|                 | 3      | 1         | -1         | -1         | -1       | -1       | 1                  | -1         | -1         | -1       | -1       |
|                 | 4      | 1         | -1         | -1         | -1       | -1       | 1                  | 1          | -1         | 1        | 1        |
|                 | 5      | 1         | -1         | -1         | 1        | -1       | 1                  | -1         | -1         | 1        | -1       |
| Lumen           | 1      | -1        | 1          | 1          | 1        | -1       | -1                 | 1          | -1         | 1        | -1       |
|                 | 2      | 1         | -1         | 1          | -1       | -1       | 1                  | -1         | 1          | 1        | -1       |
|                 | 3      | 1         | 1          | -1         | -1       | -1       | 1                  | 1          | -1         | -1       | -1       |
|                 | 4      | 1         | -1         | -1         | -1       | -1       | 1                  | -1         | -1         | -1       | -1       |
|                 | 5      | -1        | 1          | -1         | 1        | 1        | -1                 | 1          | -1         | 1        | 1        |
| Tubule          | 1      | 1         | -1         | 1          | -1       | -1       | 1                  | -1         | -1         | -1       | -1       |
|                 | 2      | 1         | -1         | -1         | -1       | -1       | 1                  | -1         | -1         | -1       | -1       |
|                 | 3      | 1         | -1         | -1         | -1       | -1       | 1                  | -1         | -1         | -1       | -1       |
|                 | 4      | 1         | -1         | -1         | -1       | -1       | 1                  | -1         | -1         | -1       | -1       |
|                 | 5      | 1         | -1         | -1         | 1        | -1       | 1                  | -1         | -1         | -1       | -1       |
| Interstitialium | 1      | -1        | 1          | -1         | 1        | 1        | -1                 | 1          | -1         | -1       | 1        |
|                 | 2      | -1        | 1          | -1         | -1       | 1        | -1                 | 1          | -1         | -1       | 1        |
|                 | 3      | -1        | 1          | -1         | 1        | 1        | -1                 | 1          | -1         | 1        | 1        |
|                 | 4      | -1        | 1          | -1         | 1        | 1        | -1                 | 1          | -1         | -1       | 1        |
|                 | 5      | -1        | 1          | -1         | 1        | 1        | -1                 | 1          | -1         | 1        | 1        |

Supplementary Figure 12. NGTDM-based texture features
